# Supplementary material for: Identification and Functional Characterization of MdNRT1.1 in Nitrogen Utilization and Abiotic Stress Tolerance in Malus domestica
Source: Int J Mol Sci. 2023 May 26;24(11):9291. doi: 10.3390/ijms24119291 (PMC10252592; doi:10.3390/ijms24119291)
Supplement: Supplementary file 1 [file ijms-24-09291-s001.zip › ijms-2352116-supplementary.pdf]

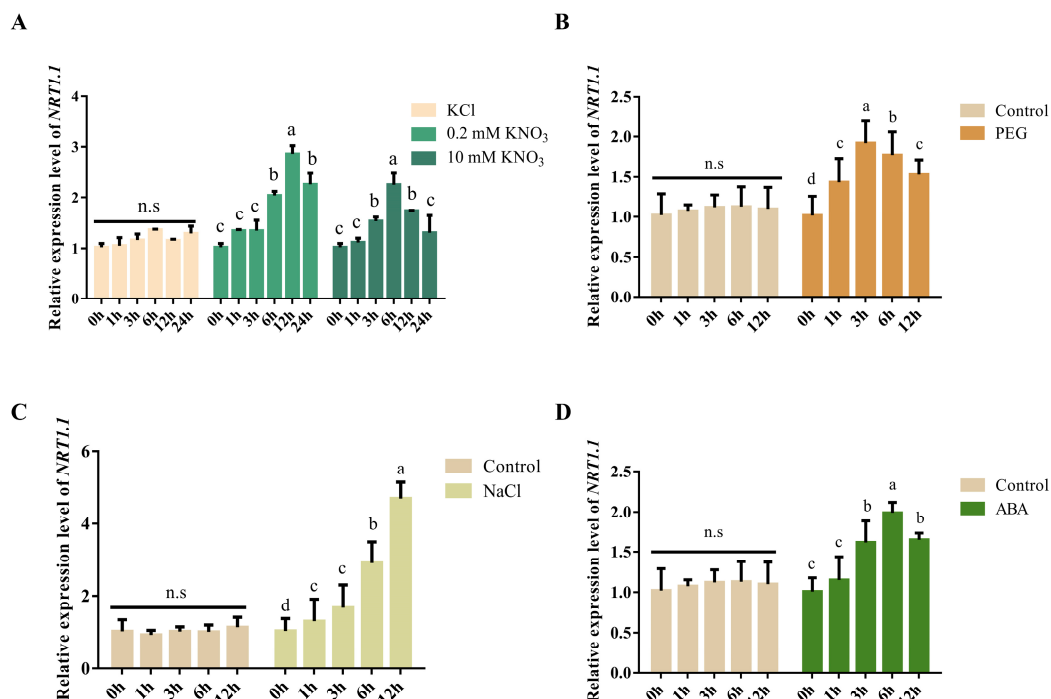

Figure S1. Expression patterns of the *MdNRT1.1* gene. (A) The expression patterns of *MdNRT1.1* genes under different nitrate concentrations (0.2 mM KNO<sub>3</sub> and 10 mM KNO<sub>3</sub>, and KCl served as 0 mM KNO<sub>3</sub> control) for 0, 1, 3, 6, 12, and 24 h. (B) The expression patterns of *MdNRT1.1* genes under PEG treatment (to serve as drought stress) for 0, 3, 6, and 12 h. (C) The expression patterns of *MdNRT1.1* genes under NaCl treatment (to serve as salt stress) for 0, 3, 6, and 12 h. (D) The expression patterns of *MdNRT1.1* genes under ABA treatment for 0, 3, 6, and 12 h. Bars represent the mean  $\pm$  SD (n = 3). Different letters above bars indicate significant differences using the LSD test ( $p < 0.05$ ).

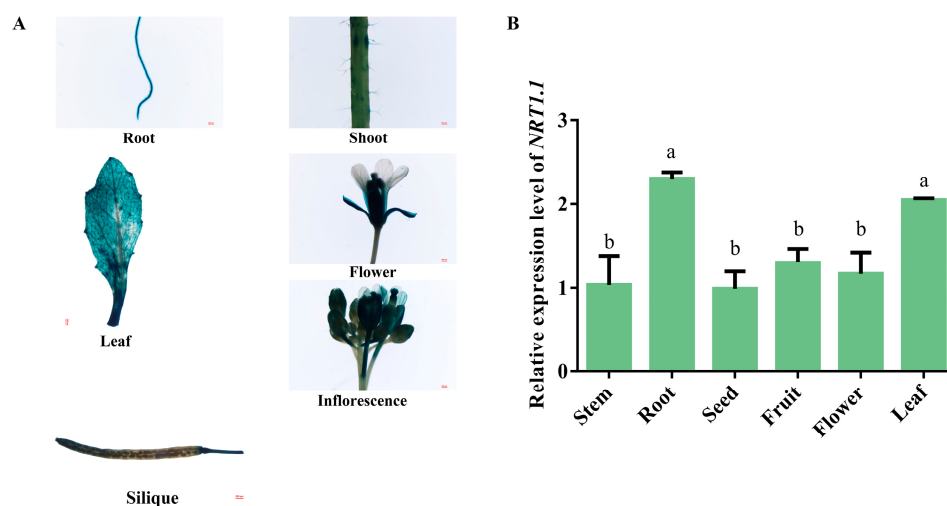

Figure S2. Tissue expression pattern of *MdNRT1.1*. (A) The GUS staining in *ProMdNRT1.1::GUS* transgenic under 2 mM KNO<sub>3</sub>. (B) Organ (stems, roots, seeds, leaves, flowers, and fruits) expression analysis of *MdNRT1.1* by qRT-PCR in Gala. Bars represent the mean  $\pm$  SD (n = 3). Different letters above bars indicate significant differences using the LSD test ( $p < 0.05$ ).

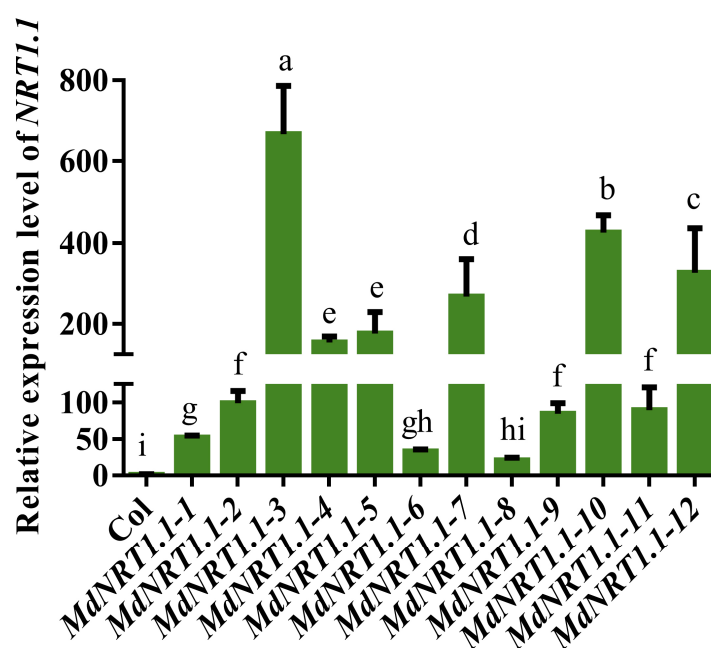

Figure S3. Detection of the transcript level of *MdNRT1.1* transgenic *Arabidopsis*. Bars represent the mean  $\pm$  SD ( $n = 3$ ). Different letters above the bars indicate significant differences using the LSD test ( $p < 0.05$ ).

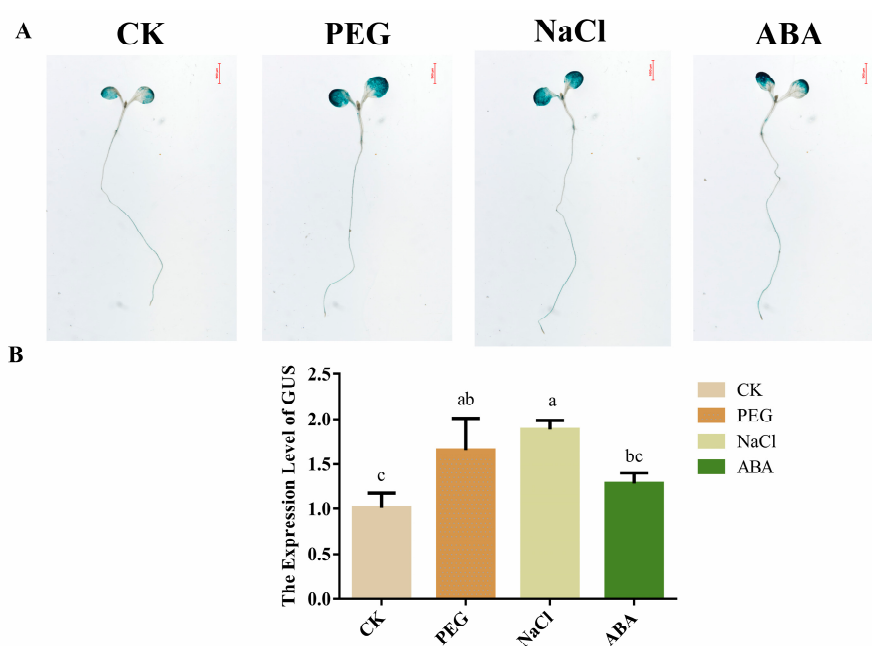

Figure S4. GUS staining in *ProMdNRT1.1::GUS* transgenic *Arabidopsis* in response to abiotic stresses. (A) The *ProMdNRT1.1::GUS* transgenic *Arabidopsis* was treated with 5% PEG, 100 mM NaCl, and 30  $\mu$ M ABA, respectively. (B) The GUS expression of *MdNRT1.1* of (A). Bars represent the mean  $\pm$  SD ( $n = 3$ ). Different letters above the bars indicate significant differences using the LSD test ( $p < 0.05$ ).

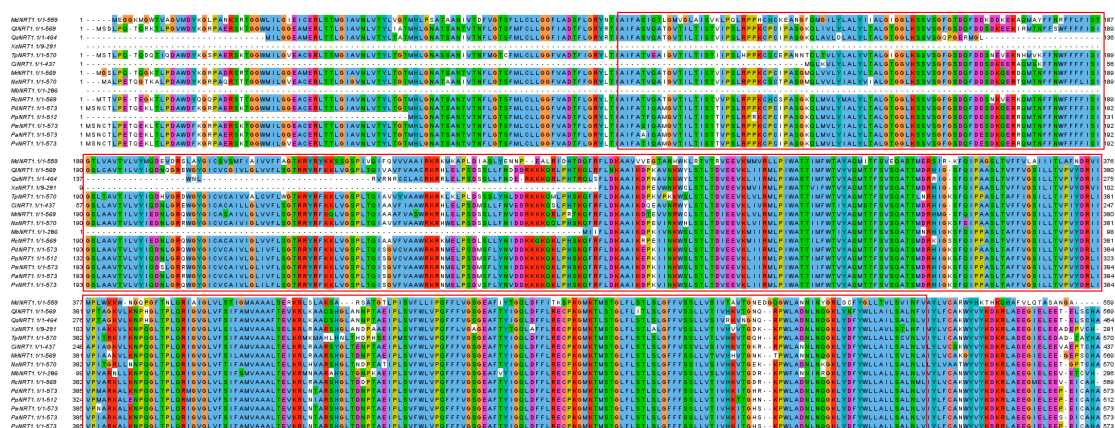

**Figure S5.** Alignment of amino acid sequences of MdNRT1.1 and other NRT1.1 proteins. The red box represents a conserved domain. They all had a Pfam domain.

**Table S1.** Primers for quantitative real-time PCR.

| Primer name                  | Sequences (5' to 3')             |
|------------------------------|----------------------------------|
| <i>MdNRT1.1-F (qRT)</i>      | 5'-AGGCACAAGACAGTACCGTTTCAAG-3'  |
| <i>MdNRT1.1-R (qRT)</i>      | 5'-CGTCAAGTCCGTTGGCAGTTCC-3'     |
| <i>MdNRT1.1-F (PRI)</i>      | 5'-GGCGGCATGGAAGAAGAGGAAC-3'     |
| <i>MdNRT1.1-R (PRI)</i>      | 5'-TGGTTGCTTGGGACACTGAGAATG-3'   |
| <i>MdNRT1.1-F (p1300-GN)</i> | 5'-AAGCTTGCATCTGACCATTCTGGTT-3'  |
| <i>MdNRT1.1-R (p1300-GN)</i> | 5'-GGATCCTGTACTAACTAATGCCACTA-3' |
| <i>Md18S-F (qRT)</i>         | 5'-ACACGGGGGAGGTAGTGACAA-3'      |
| <i>Md18S-R (qRT)</i>         | 5'-CTCTTCTCAATCTCCCTGGATCG-3'    |
